# Supplementary material for: The Effects of Plant Health Status on the Community Structure and Metabolic Pathways of Rhizosphere Microbial Communities Associated with Solanum lycopersicum
Source: MDPI journal article supplement (doi:10.3390/horticulturae8050404), 2022-05-04
Supplement: s1 [file s1]

## SUPPLEMENTARY DATA

**Table S1: Analysis of sequenced data and diversity evaluation of the shotgun metagenome from the rhizosphere and bulk soil of the tomato plant**

| Sample site                 | HR              | DR                                | BR              |
|-----------------------------|-----------------|-----------------------------------|-----------------|
|                             |                 | <b><u>Sequence uploaded</u></b>   |                 |
| bp Count                    | 2152004650.3 bp | 1409528303.3 bp                   | 1477197003 bp   |
| Sequences Count             | 13739258.3      | 19765082                          | 138145859.3     |
| Mean Sequence Length        | 154 $\pm$ 32 bp | 155 $\pm$ 32 bp                   | 155 $\pm$ 32 bp |
| Mean GC percent             | 64 $\pm$ 10 %   | 64 $\pm$ 10 %                     | 65 $\pm$ 9 %    |
| Artificial Duplicate Reads  | 836435          | 757641.7                          | 374748          |
|                             |                 | <b><u>Post QC sequences</u></b>   |                 |
| bp Count                    | 765041235.3     | 1352124415                        | 1385218693      |
| Sequences Count             | 12665143.7      | 11966279.7                        | 5247459         |
| Mean Sequence Length        | 155 $\pm$ 33 bp | 156 $\pm$ 39 bp                   | 156 $\pm$ 34 bp |
| Mean GC percent             | 63 $\pm$ 9 %    | 64 $\pm$ 9 %                      | 64 $\pm$ 9 %    |
|                             |                 | <b><u>Processed Sequences</u></b> |                 |
| Predicted Protein Features  | 7850484.3       | 4208873.7                         | 11448097.3      |
| Predicted rRNA Features     | 28853           | 30027                             | 25322.7         |
|                             |                 | <b><u>Alignment Sequences</u></b> |                 |
| Identified Protein Features | 3985525.7       | 4178206.3                         | 2515439.7       |
| Identified rRNA Features    | 5962.7          | 7656.7                            | 5439.3          |

Values presented in the table are the means of the replicates from each cropping site. Healthy rhizosphere (HR), diseased rhizosphere (DR) of the tomato plant, and bulk soil (BR)

**Table S2: Evaluation of major phyla in the rhizosphere of the tomato plant, and bulk soil (BR).**

| <b>Phylum</b>                              | <b>HR</b>   | <b>DR</b>   | <b>BR</b>    | <b>p-Value</b> |
|--------------------------------------------|-------------|-------------|--------------|----------------|
| <b>Proteobacteria</b>                      | 54.0±0.42   | 45.9±2.06   | 38.8±2.41    | 0.05           |
| <b>Actinobacteria</b>                      | 35.50±2.3   | 28.13±0.6   | 25.36±0.6    | 0.03           |
| <b>Acidobacteria</b>                       | 5.0±0.2     | 2.28±0.1    | 5.18±0.6     | 0.07           |
| <b>Bacteroidetes</b>                       | 3.0±0.2     | 3.96±0.2    | 3.39±0.2     | 0.08           |
| <b>Planctomycetes</b>                      | 3.40±0.1    | 2.6±0.1     | 2.59±0.1     | 0.08           |
| <b>Chloroflexi</b>                         | 2.84±0.2    | 2.55±0.2    | 1.27±0.03    | 0.05           |
| <b>Firmicutes</b>                          | 2.31±0.2    | 1.69±0.06   | 2.43±0.1     | 0.07           |
| <b>Verrucomicrobia</b>                     | 2.34 ±0.1   | 2.23 ±0.10  | 2.15 ±0.1    | 0.67           |
| <b>Cyanobacteria</b>                       | 1.96 ±0.3   | 0.92 ±0.05  | 1.84 ±0.23   | 0.06           |
| <b>Gemmatimonadetes</b>                    | 1.31 ±0.1   | 1.6 ±0.07   | 1.1 ±0.03    | 0.11           |
| <b>unclassified (derived Bacteria)</b>     | 0.65 ±0.01  | 0.89 ±0.02  | 0.9 ±0.06    | 0.06           |
| <b>Nitrospirae</b>                         | 0.39 ±0.02  | 0.37 ±0.03  | 0.31 ±0.02   | 0.10           |
| <b>Deinococcus-Thermus</b>                 | 0.43 ±0.02  | 0.28 ±0.01  | 0.42 ±0.02   | 0.05           |
| <b>Euryarchaeota</b>                       | 0.25 ±0.02  | 0.41 ±0.03  | 0.43 ±0.03   | 0.05           |
| <b>Ascomycota</b>                          | 0.79 ±0.11  | 0.45 ±0.05  | 0.45 ±0.07   | 0.07           |
| <b>Thaumarchaeota</b>                      | 0.29 ±0.03  | 0.18 ±0.04  | 0.15 ±0.05   | 0.15           |
| <b>Chlorobi</b>                            | 0.15 ±0.01  | 0.15 ±0.01  | 0.12 ±0.01   | 0.07           |
| <b>Crenarchaeota</b>                       | 0.10 ±0.01  | 0.06 ±0.01  | 0.13 ±0.01   | 0.06           |
| <b>Spirochaetes</b>                        | 0.07 ±0.003 | 0.08 ±0.001 | 0.08 ±0.001  | 0.06           |
| <b>Aquificae</b>                           | 0.04 ±0.002 | 0.06 ±0.01  | 0.06 ±0.003  | 0.07           |
| <b>Synergistetes</b>                       | 0.05 ±0.003 | 0.05±0.001  | 0.04 ±0.002  | 0.06           |
| <b>Thermotogae</b>                         | 0.05 ±0.003 | 0.05±0.01   | 0.03 ±0.001  | 0.07           |
| <b>unclassified (derived from Archaea)</b> | 0.04 ±0.002 | 0.03 ±0.004 | 0.02 ±0.001  | 0.06           |
| <b>Basidiomycota</b>                       | 0.03 ±0.004 | 0.02 ±0.001 | 0.02 ±0.001  | 0.19           |
| <b>Korarchaeota (Archaea)</b>              | 0.03 ±0.000 | 0.00 ±0.000 | 0.004 ±0.000 | 0.04           |
| <b>Nanoarchaeota (Archaea)</b>             | 0.00 ±0.000 | 0.00 ±0.000 | 0.00 ±0.000  | 0.07           |
| <b>Blastocladiomycota (Fungi)</b>          | 0.00 ±0.000 | 0.00 ±0.000 | 0.00 ±0.000  | 0.67           |

**Key:** Healthy rhizosphere (HR), diseased rhizosphere (DR) of the tomato plant, and bulk soil (BR)

## Rarefaction Analysis

The richness and diversity of the endophytic fungi and archaea were assessed using rarefaction analysis through MG-RAST. The rarefaction curve generated revealed that samples from the HR= rhizosphere soil of healthy tomato plant harbored the most rhizospheric microbes, followed by DR= rhizosphere soil of diseased tomato plant; and lowest in BR= bulk soil obtained from the soil without tomato plantation.

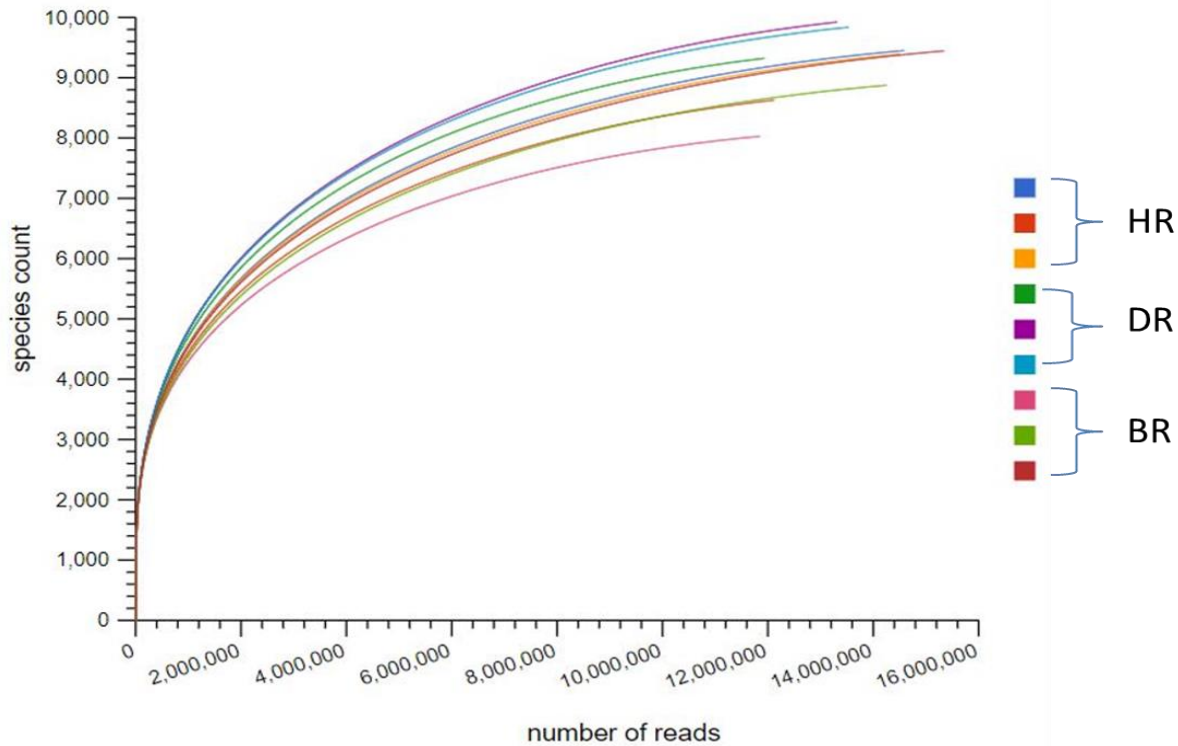

Figure S1: The abundance and Species richness of the microorganisms in the rhizosphere were investigated through rarefaction analysis with MG-RAST.
